# Supplementary material for: Effect of Oxygen Functional Groups in Reduced Graphene Oxide-Coated Silk Electronic Textiles for Enhancement of NO2 Gas-Sensing Performance
Source: PubMed Central journal article supplement — ACS Omega. 2021 Oct 6;6(41):27080–8. doi: 10.1021/acsomega.1c03658 (PMC8529668; doi:10.1021/acsomega.1c03658), 2021-10-06
Supplement: ao1c03658_si_001.pdf [file ao1c03658_si_001.pdf]

Supporting Information

## **Effect of oxygen functional groups in reduced graphene oxide-coated silk electronic textiles for enhancement of NO<sub>2</sub> gas sensing performance**

Won Taek Jung<sup>a, ‡</sup>, Hyun-Seok Jang<sup>a, ‡</sup>, Jun Woo Jeon<sup>a</sup>, Byung Hoon Kim<sup>a, b, c, \*</sup>

<sup>a</sup> Department of Physics, Incheon National University, Incheon 22012, Republic of Korea

<sup>b</sup> Intelligent Sensor Convergence Research Center, Incheon National University, Incheon 22012, Republic of Korea

<sup>c</sup> Institute of Basic Science, Incheon National University, Incheon 22012, Republic of Korea

\* Corresponding author ([kbh37@inu.ac.kr](mailto:kbh37@inu.ac.kr))

‡ These authors contributed equally to this work.

**Table S1.** The response of the rGO-based e-textile NO<sub>2</sub> sensors.

| Sample                      | Temp. (°C) | Condition | NO <sub>2</sub> (ppm) | Response (%) | References                                             |
|-----------------------------|------------|-----------|-----------------------|--------------|--------------------------------------------------------|
| rGO/Silk                    | 25         | Dry       | 1.0                   | 15.5         | This work                                              |
| rGO/Nylon-6                 | 100        | Dry       | 1.2                   | 14.0         | <i>Nanoscale</i> 2014, 6, 6511-6514                    |
| rGO/Cotton Yarn             | RT         | Dry       | 1.25                  | 12.0         | <i>Sci. Rep.</i> 2015, 5, 10904                        |
| rGO/Polyester Yarn          | RT         | Dry       | 1.25                  | 12.0         |                                                        |
| rGO/CT/ET Fiber             | RT         | Dry       | 1.0                   | 7.0          | <i>ACS Sens.</i> 2019, 4, 10, 2809–2818                |
| rGO/Cotton Yarn             | RT         | Dry       | 2.5                   | < 10.0       | <i>Sens. Actuators B-Chem.</i> 2017, 248, 829-835      |
| rGO/Nylon Mesh Fiber        | RT         | RH 80%    | 1.0                   | 13.6         | <i>Sens. Actuators B-Chem.</i> 2018, 257, 846-852      |
| rGO/polyester sheet         | RT         | Dry       | 1.0                   | 2.75         | <i>Sens. Actuators B-Chem.</i> 2021, 345, 130361       |
| rGO coated yarn             | RT         | RH 25%    | 1.5                   | 15.0         | <i>RSC Adv.</i> 2018, 8, 11991-11996                   |
| rGO/polyester, spandex yarn | RT         | Dry       | 5.0                   | > 15         | <i>RSC Adv.</i> 2018, 8, 7615-7621                     |
| planar rGO sheet            | RT         | Dry       | 1.0                   | 3.7          | <i>ACS Appl. Mater. Interfaces</i> 2019, 11, 9309-9316 |
| rGO thin film               | 90         | Dry       | 1.0                   | ~4           | <i>Appl. Surf. Sci.</i> 2018, 456, 7-12                |

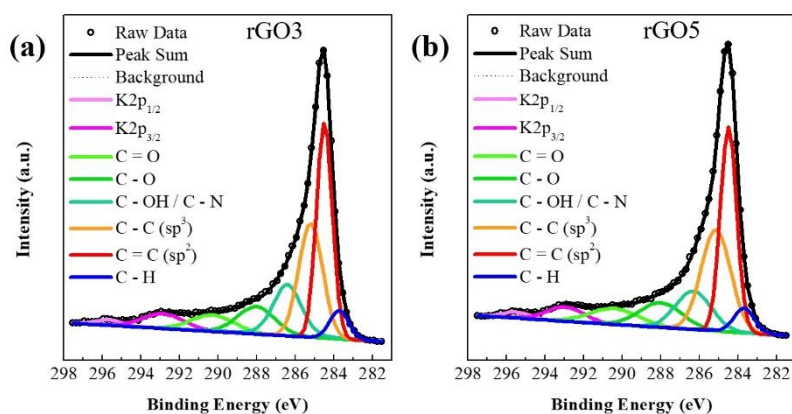

**Figure S1.** XPS C1s spectra of (a) rGO3 and (b) rGO5.

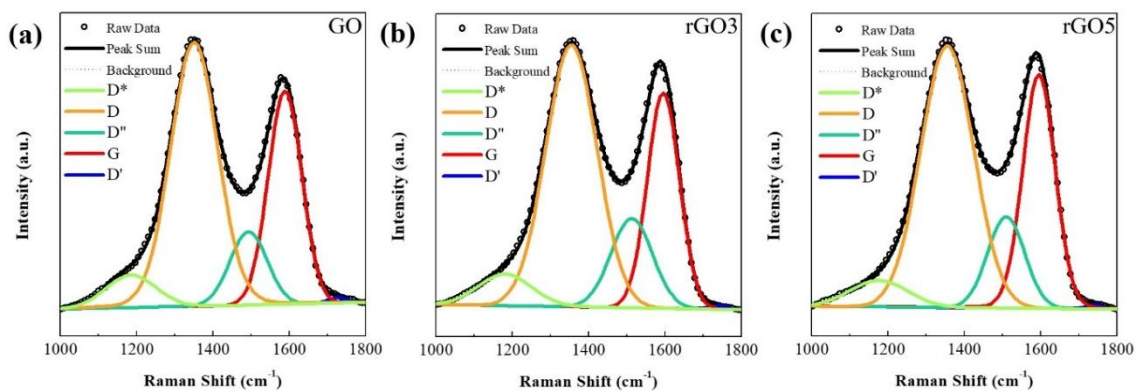

**Figure S2.** The fitted Raman spectra of (a) GO, (b) rGO3, and (c) rGO5.

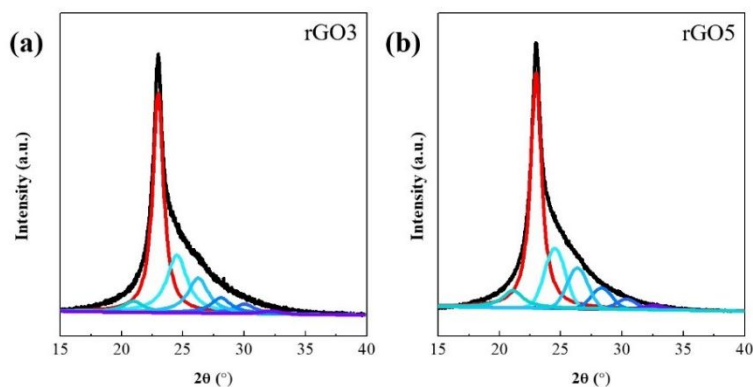

**Figure S3.** The amorphous structure overlapped (002) lattice plane of (a) rGO3 and (b) rGO5.

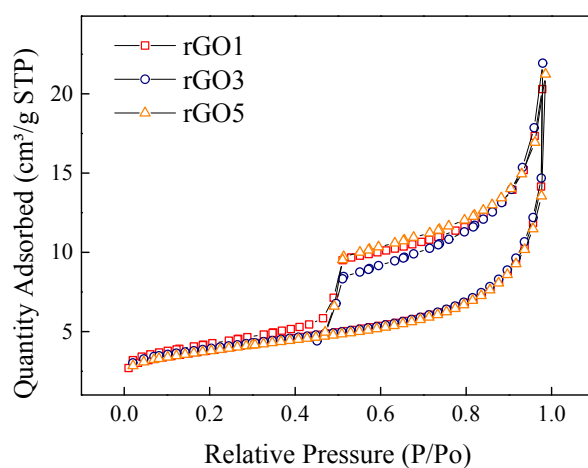

**Figure S4.** N<sub>2</sub> sorption isothermals of rGO<sub>n</sub> at 77 K.

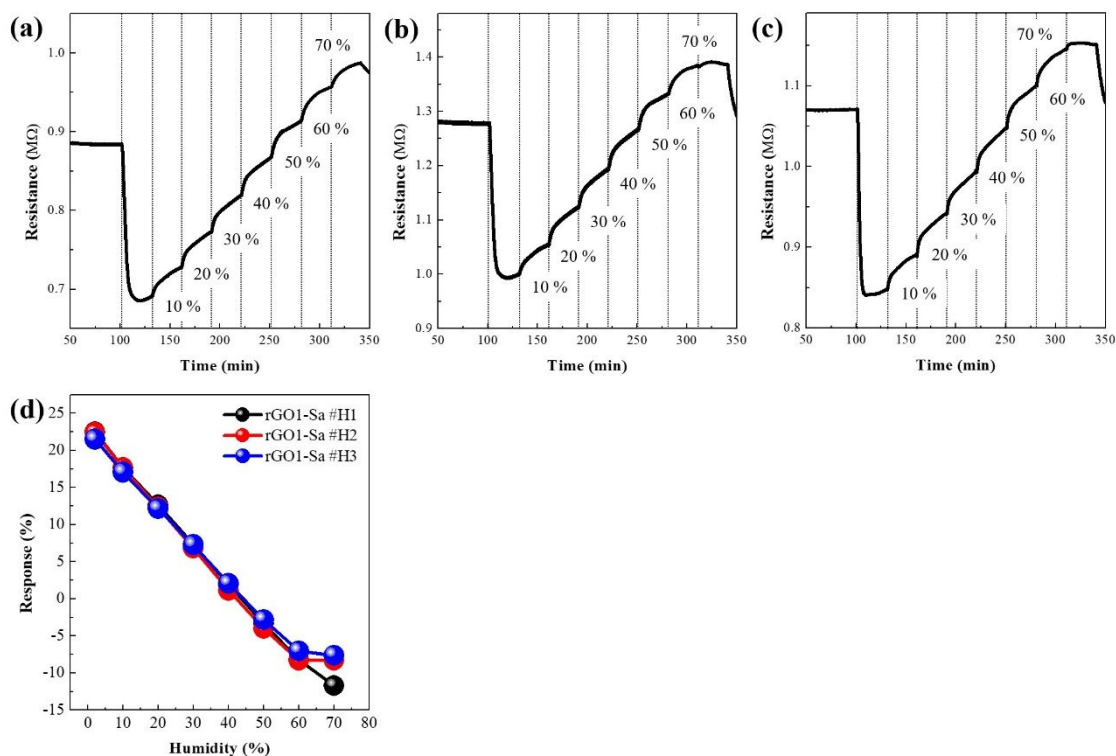

**Figure S5.** The resistance variance of (a) rGO1-Sa #H1, (b) rGO1-Sa #H2, and (c) rGO1-Sa #H3 reduced heating rate 1°C/min. (d) The sensing response of the three rGO1-Sa samples as a function of humidity.

## References

- [S1] Yun, Y. J.; Hong, W. G.; Choi, N. -J.; Park, H. J.; Moon, S. E.; Kim, B. H.; Song, K. - B.; Jun, Y.; Lee, H. -K. A 3D scaffold for ultra-sensitive reduced graphene oxide gas sensors. *Nanoscale*. **2014**, *6*, 6511-6514.
- [S2] Yun, Y. J.; Hong, W. G.; Choi, N. -J.; Kim, B. H.; Jun, Y.; Lee, H. -K. Ultrasensitive and highly selective Graphene-based single yarn for use in wearable gas sensor. *Sci. Rep.* **2015**, *5*, 10904.

- [S3] Li, W.; Chen, R.; Qi, W.; Cai, Li.; Sun, Y.; Sun, M.; Li, C.; Yang, X.; Xiang, L.; Xie, D.; Rne, T. Reduced Graphene Oxide/Mesoporous ZnO NSs Hybrid Fibers for Flexible, Stretchable, Twisted, and Wearable NO<sub>2</sub> E-Textile Gas Sensor. *ACS Sens.* **2019**, 4, 10, 2809-2818.
- [S4] Yun, Y. J.; Hong, W. G.; Kim, D. Y.; Kim, H. J., Jun, Y.; Lee, H. -K. E-textile gas sensors composed of molybdenum disulfide and reduced graphene oxide for high response and reliability. *Sens. Actuators B-Chem.* **2017**, 248, 829-835.
- [S5] Park, H. J.; Kim, W. -J.; Lee, H. -K.; Lee, D. -S.; Shin, J. -H.; Jun, Y.; Yun, Y. J. Highly flexible, mechanically stable, and sensitive NO<sub>2</sub> gas sensors based on reduced graphene oxide nanofibrous mesh fabric for flexible electronics. *Sens. Actuators B-Chem.* **2018**, 257, 846-852.
- [S6] Lee, S. W.; Jung, H. G.; Jang, J. W.; Park, D.; Lee, D.; Kim, I.; Kim, Y.; Cheong, D. Y.; Hwang, K. S.; Lee, G.; Yoon, D. S. Graphene-based electronic textile sheet for highly sensitive detection of NO<sub>2</sub> and NH<sub>3</sub>. *Sens. Actuators B-Chem.* **2021**, 345, 130361.
- [S7] Kang, M. -A.; Ji, S.; Kim, S.; Park, C. -Y.; Myung, S.; Song, W.; Lee, S. S.; Lim, J.; An, K. -S. Highly sensitive and wearable gas sensors consisting of chemically functionalized graphene oxide assembled on cotton yarn. *RSC Adv.* **2018**, 8, 11991-11996.
- [S8] Yun, Y. J.; Kim, D. Y.; Hone, W. G.; Ha, D. H.; Jun, Y.; Lee, H. -K. Highly stretchable, mechanically stable, and weavable reduced graphene oxide yarn with high NO<sub>2</sub> sensitivity for wearable gas sensors. *RSC Adv.* **2018**, 8, 7615-7621.
- [S9] Li, F.; Peng, H.; Xia, D.; Yang, J.; Yang, K.; Yin, F.; Yuan, W. Highly Sensitive, Selective, and Flexible NO<sub>2</sub> Chemiresistors Based on Multilevel Structured Three-Dimensional

Reduced Graphene Oxide Fiber Scaffold Modified with Aminoanthroquinone Moieties and Ag Nanoparticles. *ACS Appl. Mater. Interfaces* **2019**, 11, 9, 9309-9316.

[S10] Jung, M. W.; Kang, S. M.; Nam, K. -H.; An, K. -S.; Ku, B. -C. Highly transparent and flexible NO<sub>2</sub> gas sensor film based on MoS<sub>2</sub>/rGO composites using soft lithographic patterning. *Appl. Surf. Sci.* **2018**, 456, 7-12.
